# Supplementary material for: From a MMP2/CK2 multitarget approach to the identification of potent and selective MMP13 inhibitors
Source: Royal Society of Chemistry journal article supplement (doi:10.1039/c8ob02990c), 2018-12-18
Supplement: c8ob02990c1.pdf [file c8ob02990c1.pdf]

## SUPPORTING INFORMATION

### From a MMP2/CK2 multitarget approach to the identification of potent and selective MMP13 inhibitors

Miryam Pastor,<sup>a</sup> José María Zapico,<sup>a</sup> Claire Coderch,<sup>a</sup> Maciej Maslyk,<sup>b</sup> Rostyslav Panchuk,<sup>c</sup> Beatriz de Pascual-Teresa\*<sup>a</sup> and Ana Ramos\*<sup>a</sup>

a. Departamento de Química y Bioquímica, Facultad de Farmacia, Universidad San Pablo-CEU, CEU Universities, Urbanización Montepríncipe, 28925, Alcorcón, Madrid, Spain.

b. Department of Molecular Biology, Faculty of Biotechnology and Environment Sciences, The John Paul II Catholic University of Lublin, 20-718, Lublin, Poland.

c. Institute of Cell Biology, NAS of Ukraine, Drahomanov Str. 14/16, 79005, Lviv, Ukraine

#### Table of Content

|                                                                                                                                             |     |
|---------------------------------------------------------------------------------------------------------------------------------------------|-----|
| 1) Figure 1. Cytotoxic effect of CK2 and MMP-2 inhibitors separately and in combination towards human T-leukemia cells of Jurkat line. .... | S1  |
| 2) <sup>1</sup> H NMR spectra of compounds <b>10-15</b> , <b>16a-c</b> , <b>19</b> , <b>22a-b</b> and <b>26</b> .....                       | S2  |
| 3) HPLC chromatograms of <b>10-15</b> , <b>16a-c</b> , <b>19</b> , <b>22a-b</b> and <b>26</b> .....                                         | S9  |
| 4) Figure 2. MD simulation of <b>26</b> .....                                                                                               | S17 |
| 5) Figure 3. MD of apo forms of MMP2 and MMP13.....                                                                                         | S18 |

---

#### 1) Figure 1. Cytotoxic effect of CK2 and MMP-2 inhibitors separately and in combination towards human T-leukemia cells of Jurkat line

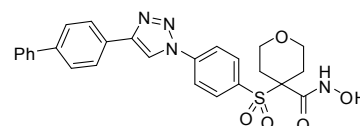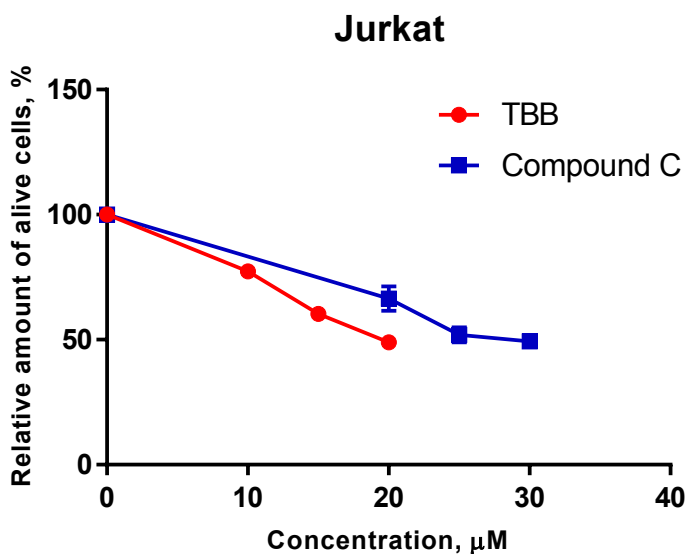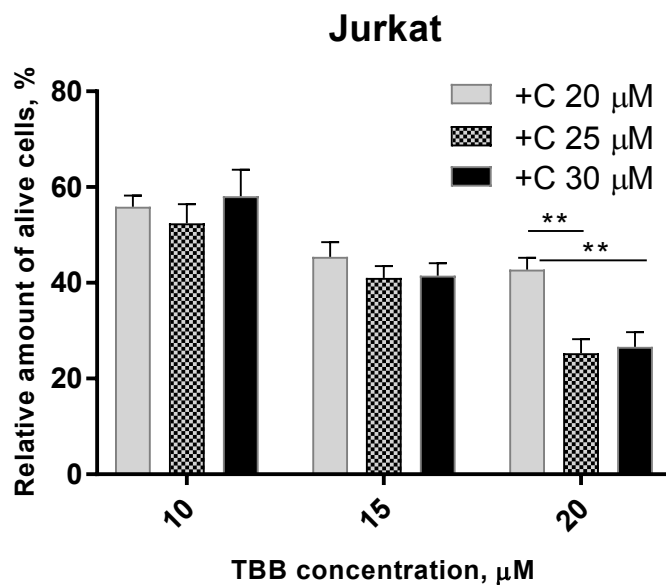

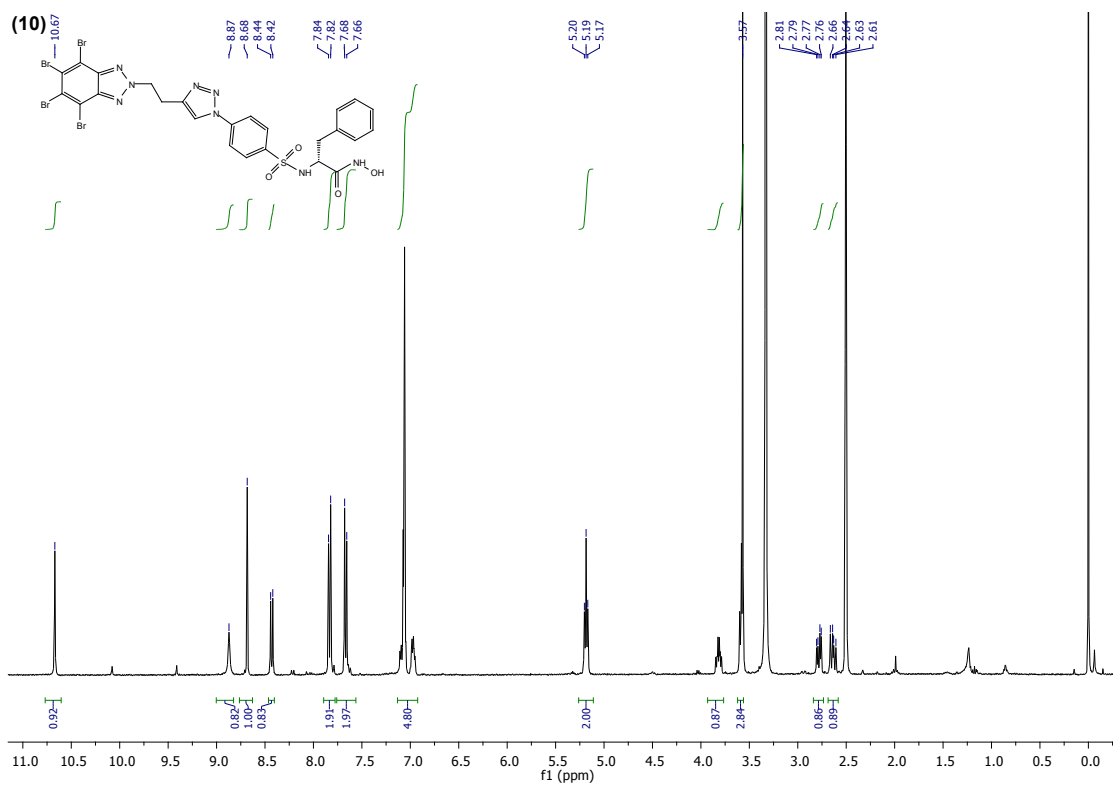

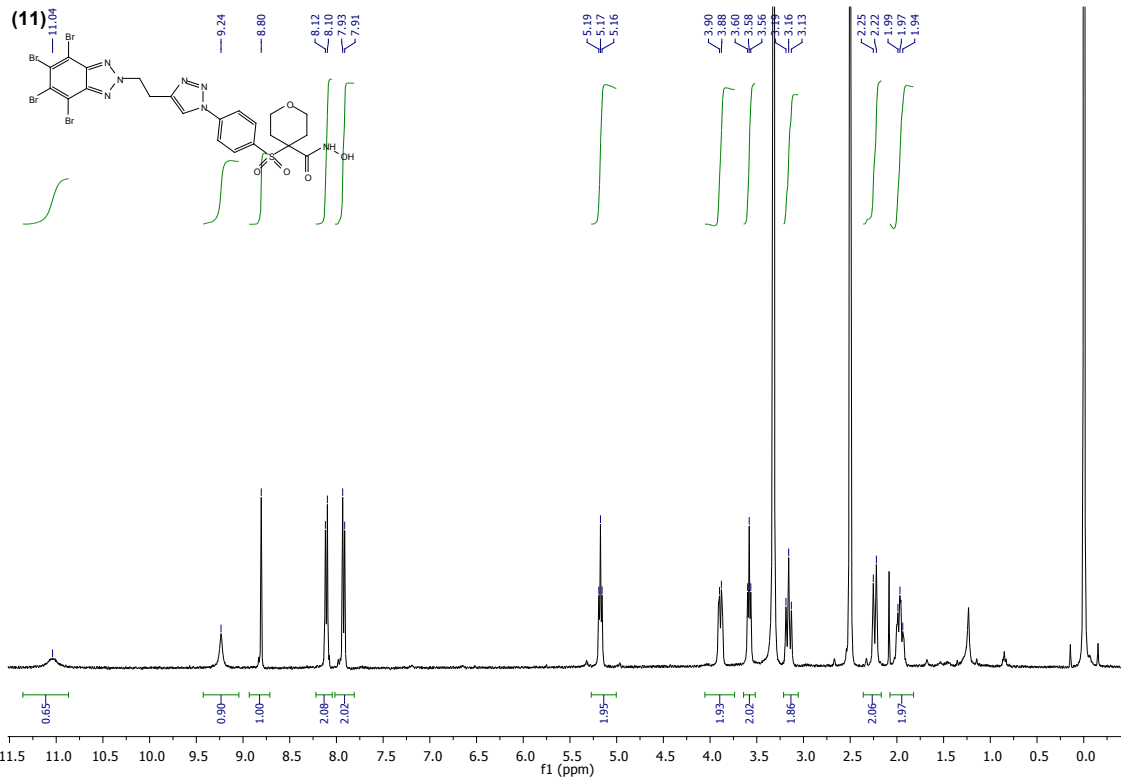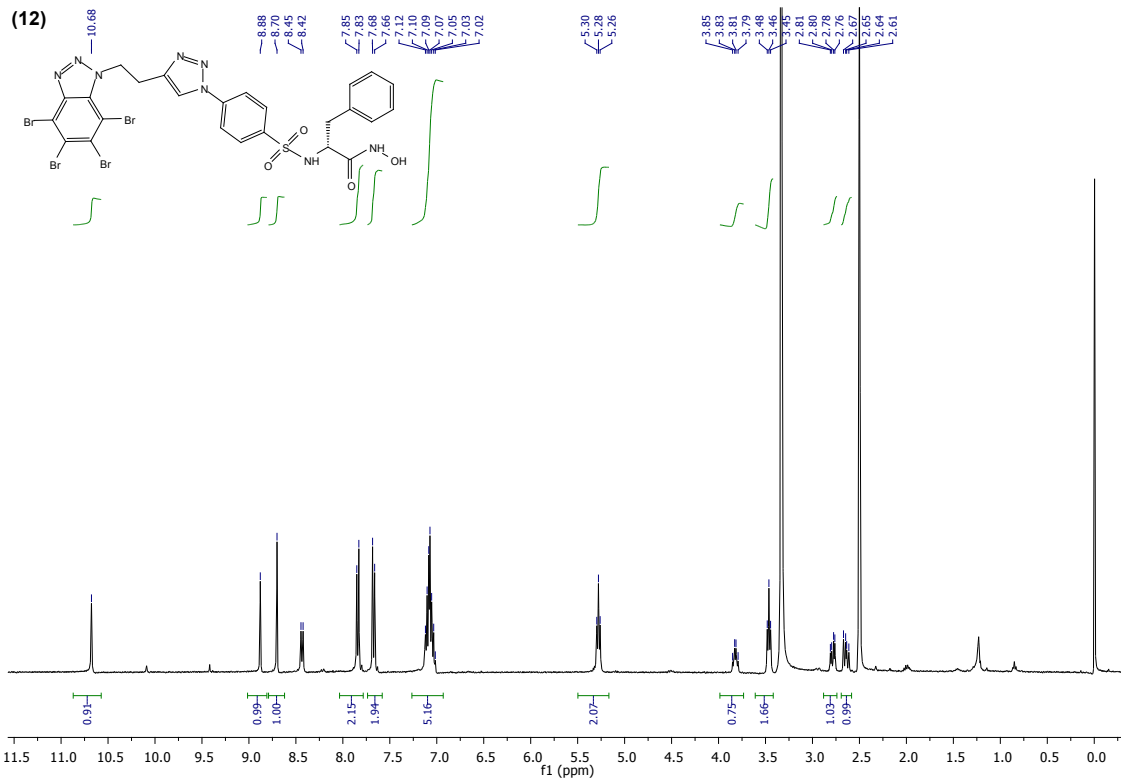

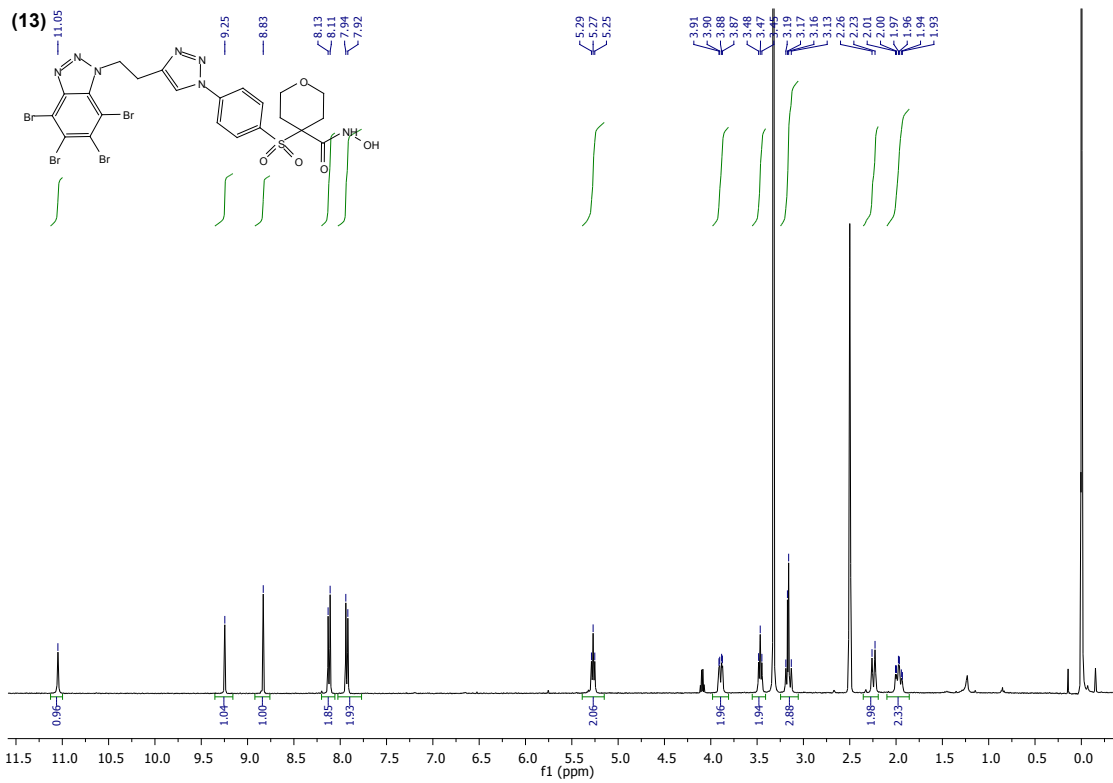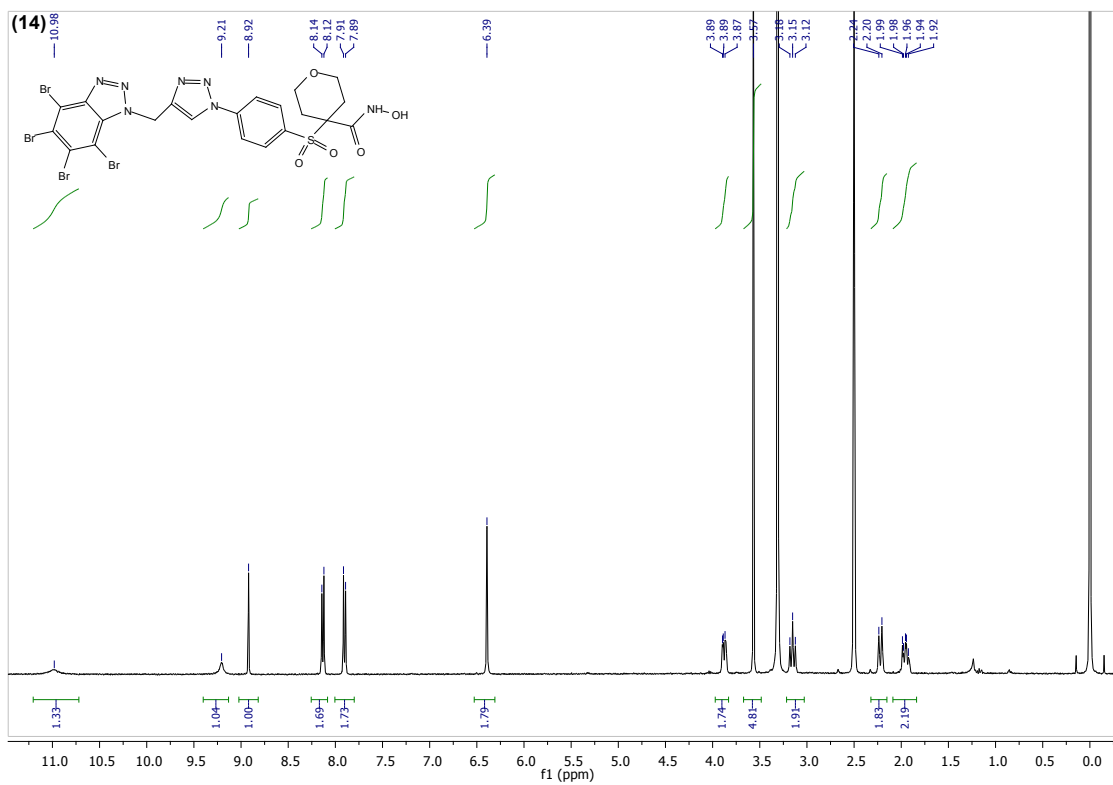

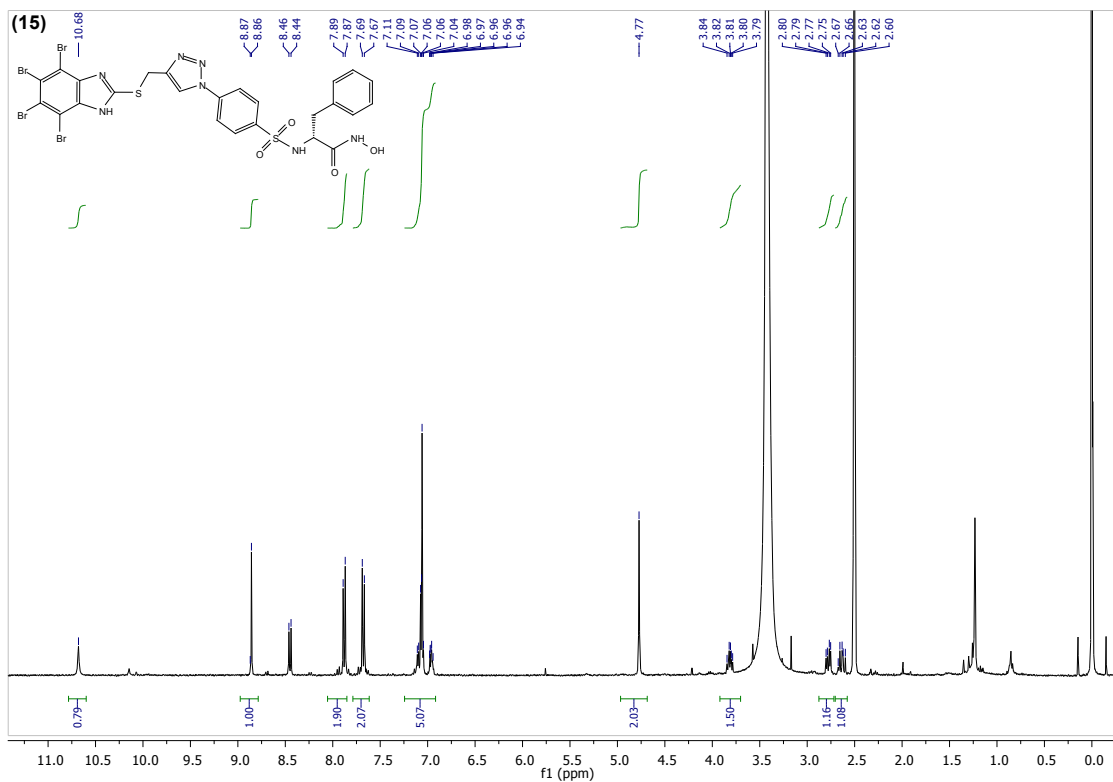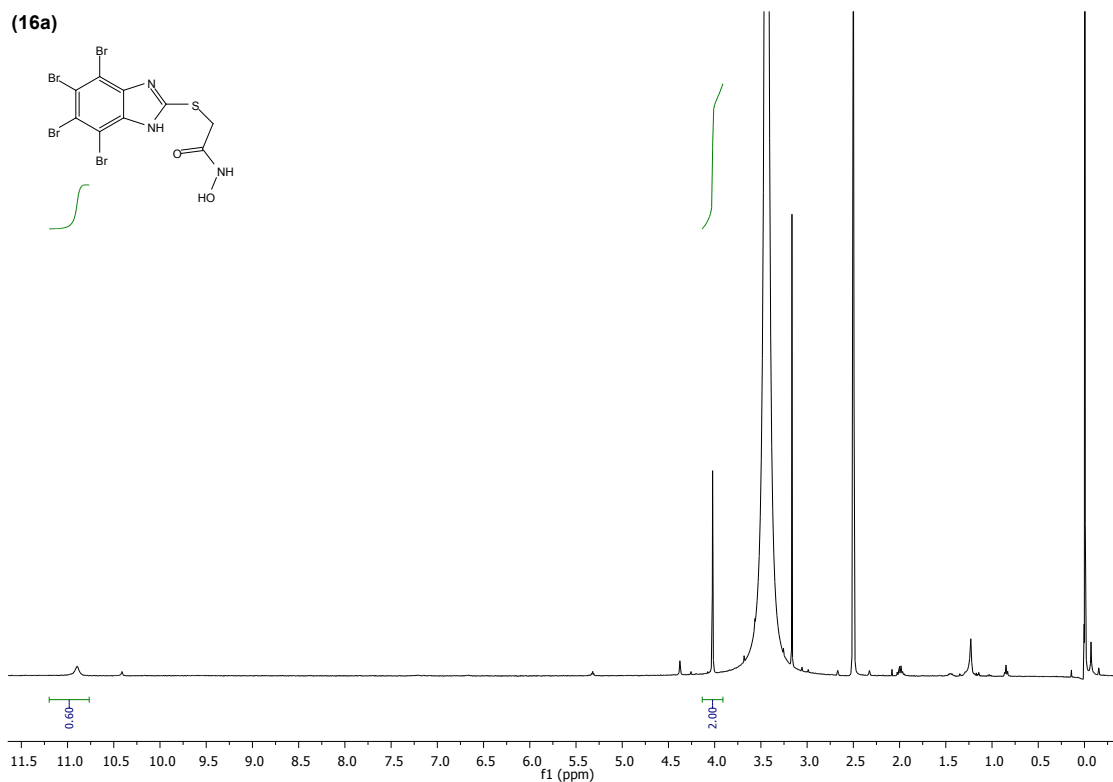

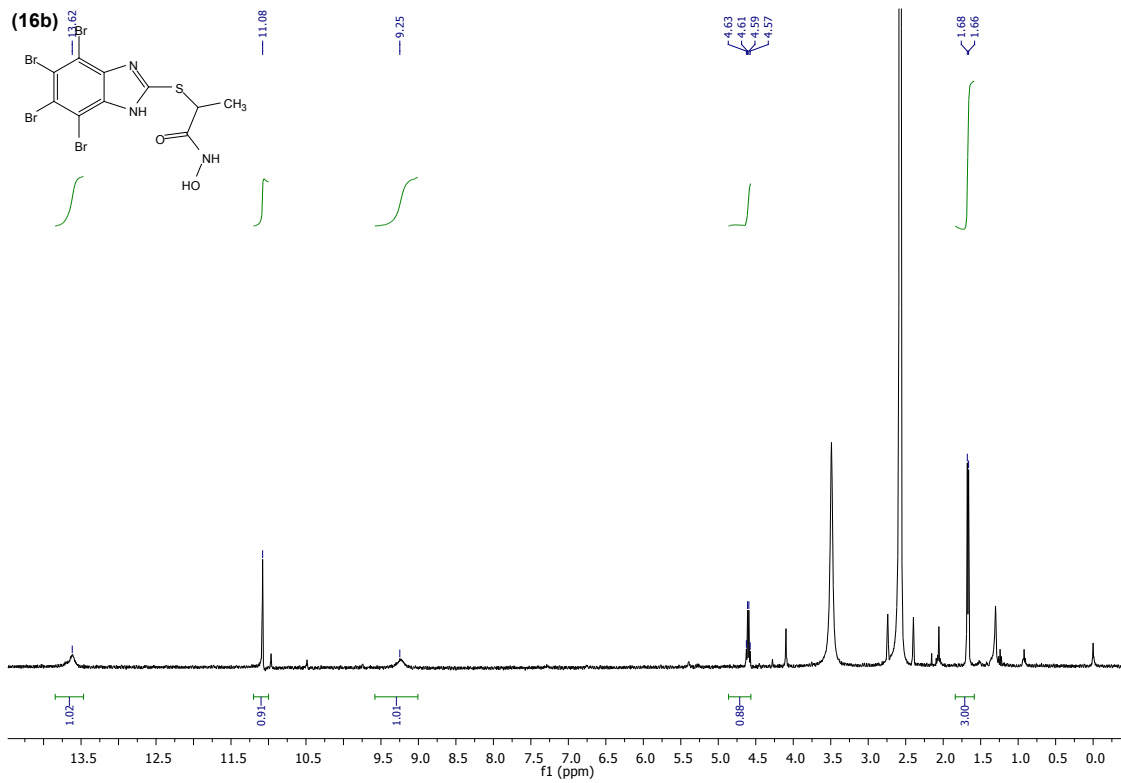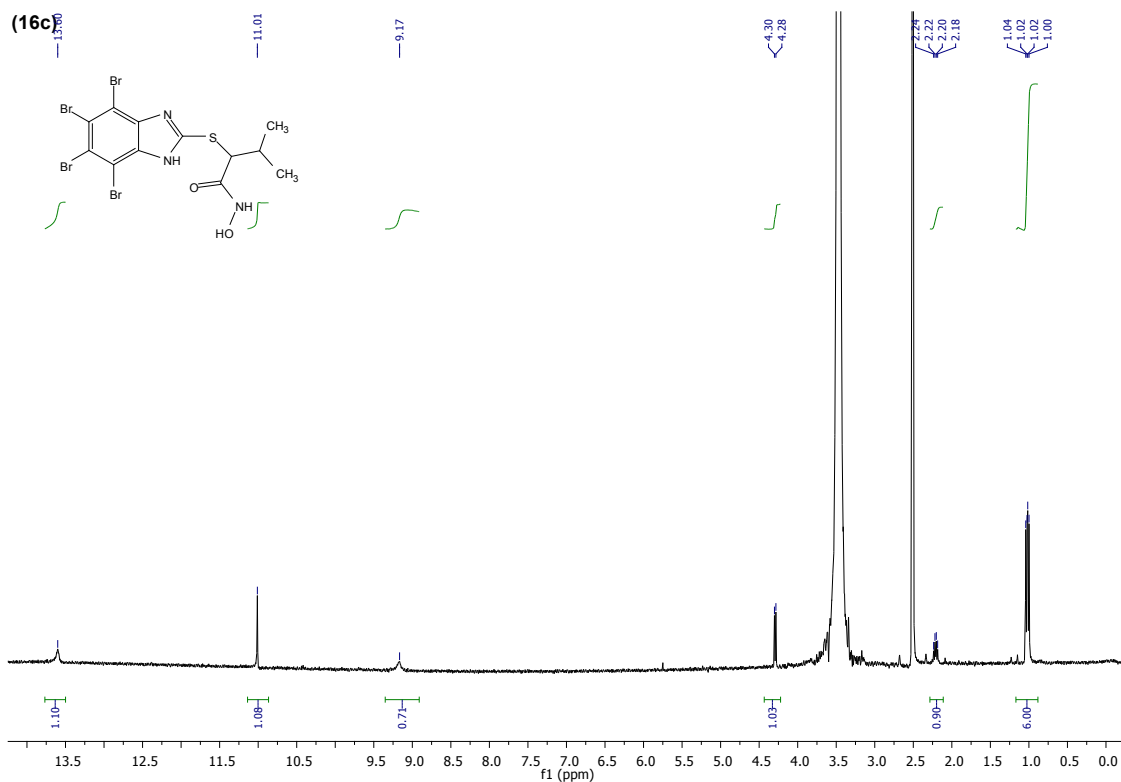

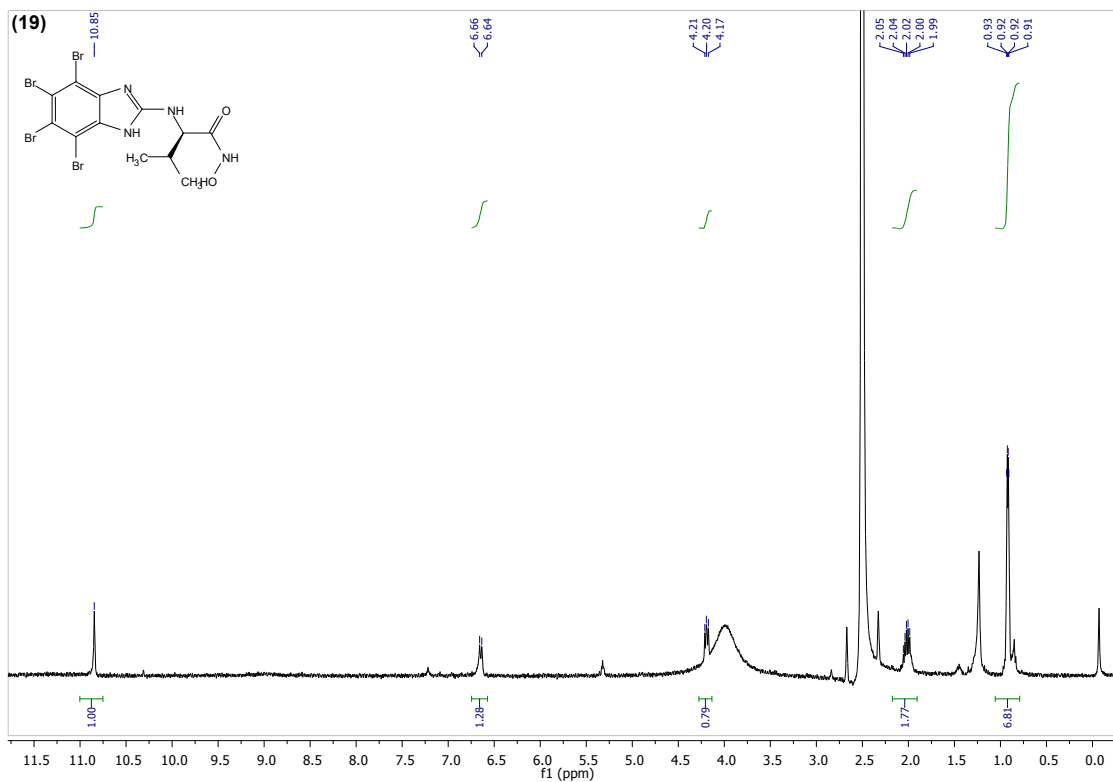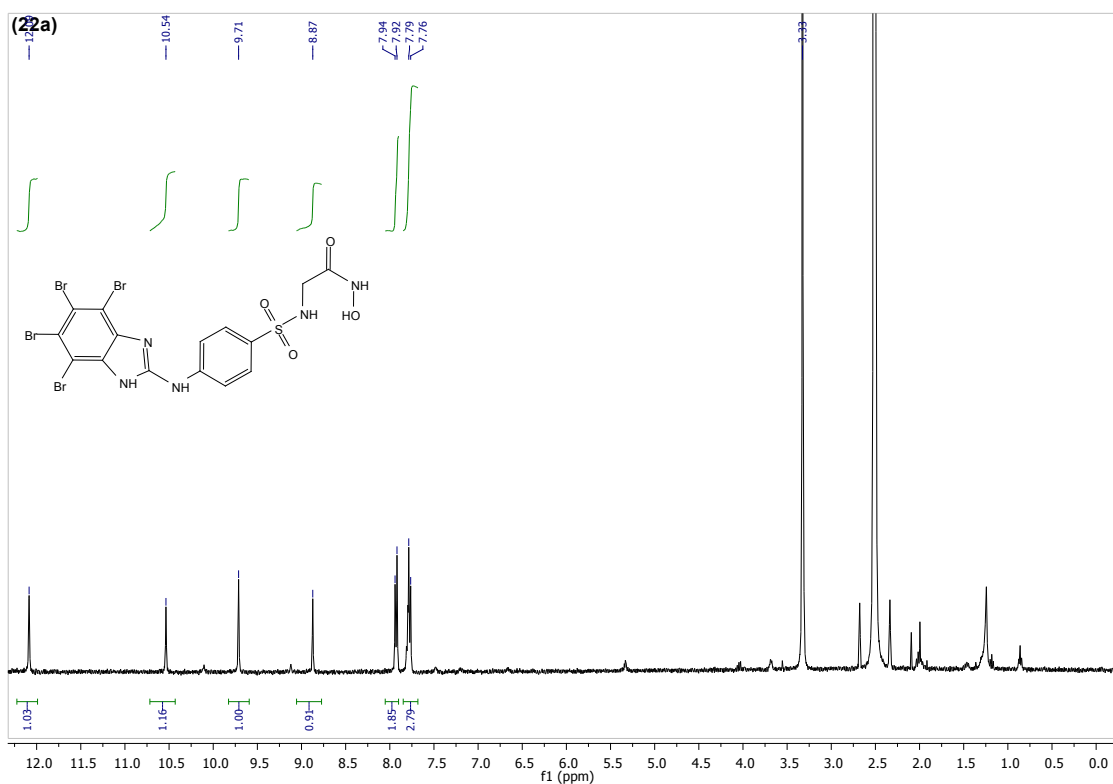

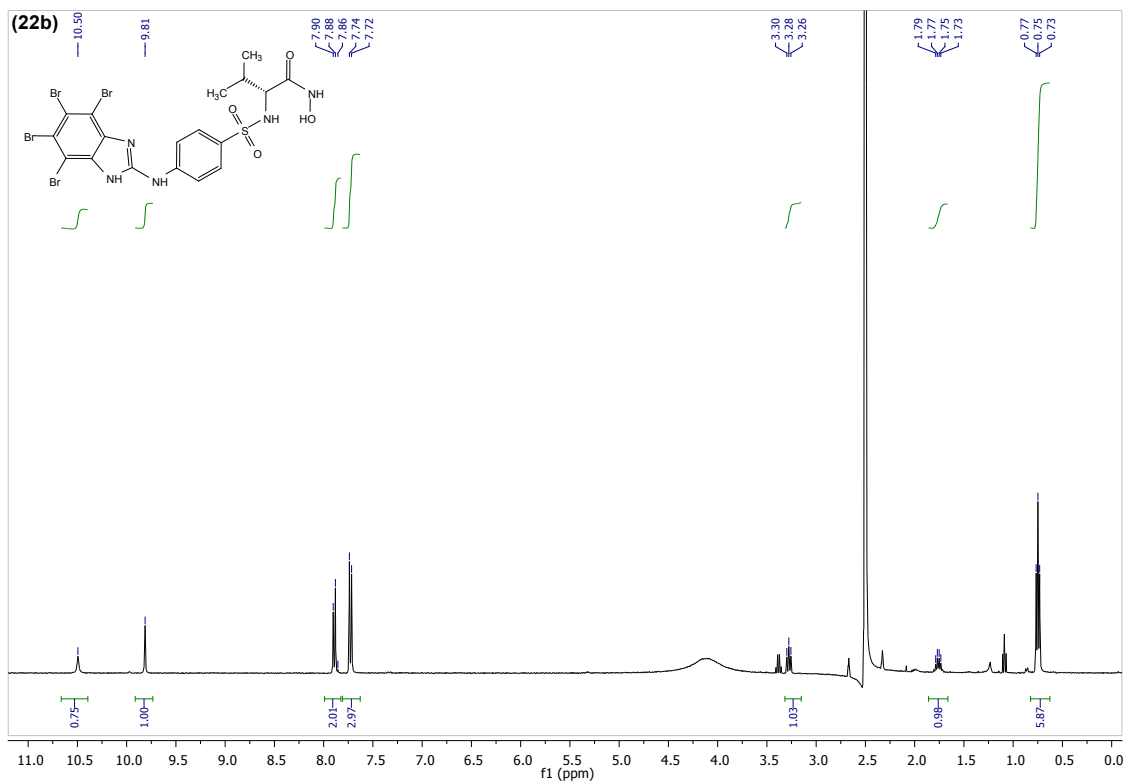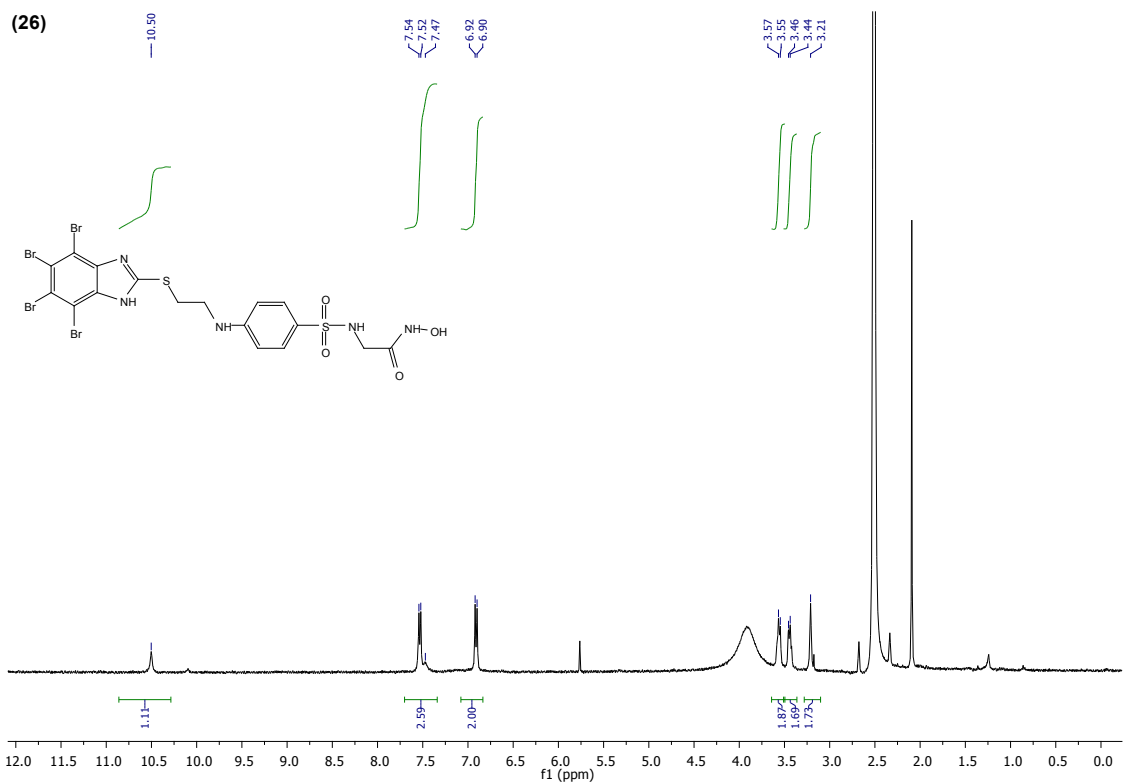



## HPLC Chromatograms

### Compound 10

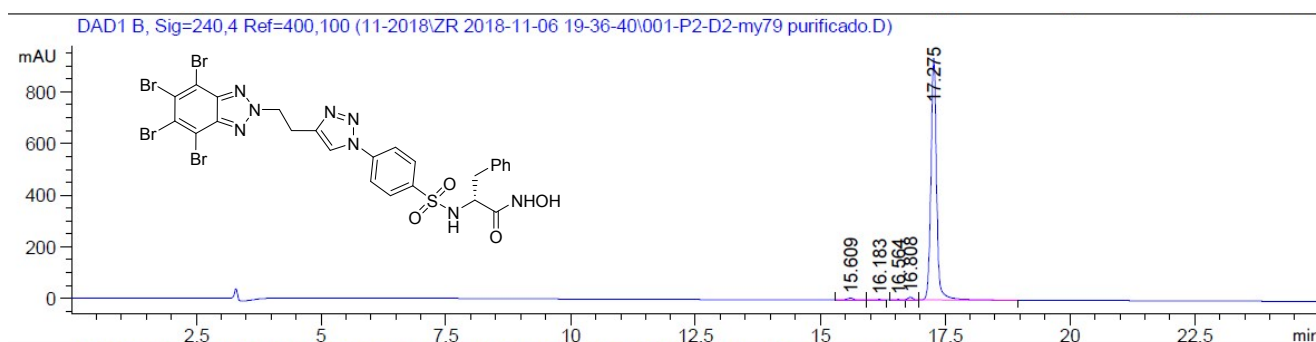

Signal 2: DAD1 B, Sig=240,4 Ref=400,100

| Peak # | RetTime [min] | Type | Width [min] | Area [mAU*s] | Height [mAU] | Area %  |
|--------|---------------|------|-------------|--------------|--------------|---------|
| 1      | 15.609        | BB   | 0.1429      | 61.86762     | 6.87823      | 0.8140  |
| 2      | 16.183        | BB   | 0.1294      | 18.24036     | 2.18442      | 0.2400  |
| 3      | 16.564        | BV E | 0.1205      | 15.15461     | 1.95372      | 0.1994  |
| 4      | 16.808        | VB R | 0.1083      | 73.37231     | 10.39911     | 0.9654  |
| 5      | 17.275        | BB   | 0.1205      | 7431.47314   | 937.66913    | 97.7812 |

Totals : 7600.10804 959.08461

### Compound 11

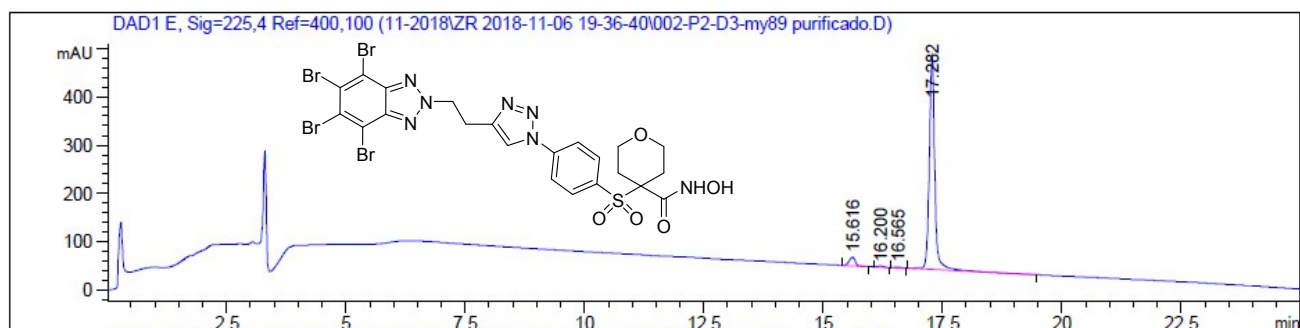

Signal 5: DAD1 E, Sig=225,4 Ref=400,100

| Peak # | RetTime [min] | Type | Width [min] | Area [mAU*s] | Height [mAU] | Area %  |
|--------|---------------|------|-------------|--------------|--------------|---------|
| 1      | 15.616        | VB   | 0.1431      | 162.11003    | 17.99987     | 4.2629  |
| 2      | 16.200        | BB   | 0.1520      | 19.02493     | 2.01830      | 0.5003  |
| 3      | 16.565        | BB   | 0.1189      | 16.12570     | 2.16466      | 0.4240  |
| 4      | 17.282        | BB   | 0.1227      | 3605.57129   | 444.02097    | 94.8128 |

Totals : 3802.83195 466.20380

## Compound 12

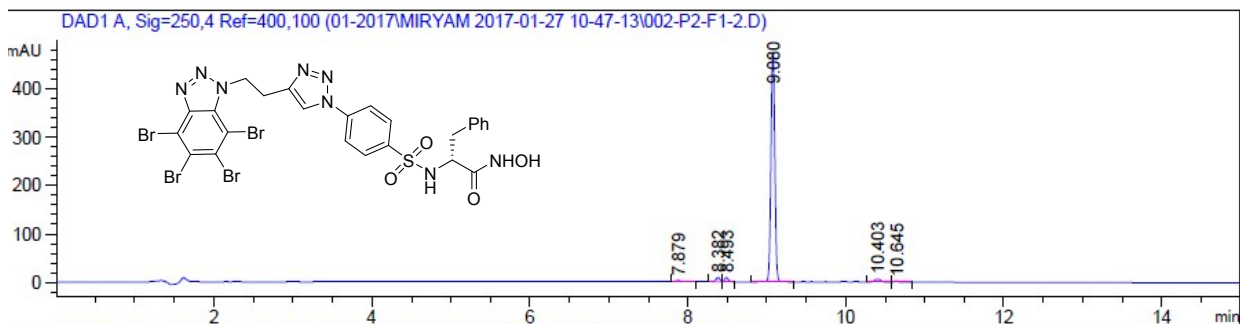

Signal 1: DAD1 A, Sig=250,4 Ref=400,100

| Peak # | RetTime [min] | Type | Width [min] | Area [mAU*s] | Height [mAU] | Area %  |
|--------|---------------|------|-------------|--------------|--------------|---------|
| 1      | 7.879         | BB   | 0.0538      | 9.63612      | 2.82170      | 0.5747  |
| 2      | 8.382         | BV   | 0.0530      | 29.17870     | 8.73382      | 1.7402  |
| 3      | 8.493         | VB   | 0.0504      | 28.56924     | 8.67325      | 1.7038  |
| 4      | 9.080         | BB   | 0.0503      | 1572.51172   | 478.78903    | 93.7812 |
| 5      | 10.403        | BV   | 0.0823      | 29.12235     | 5.63264      | 1.7368  |
| 6      | 10.645        | VB   | 0.0530      | 7.76987      | 2.32210      | 0.4634  |

Totals : 1676.78799 506.97254

## Compound 13

Data File C:\CHEM32\1\DATA\09-15\MY90.D

Sample Name: MY90

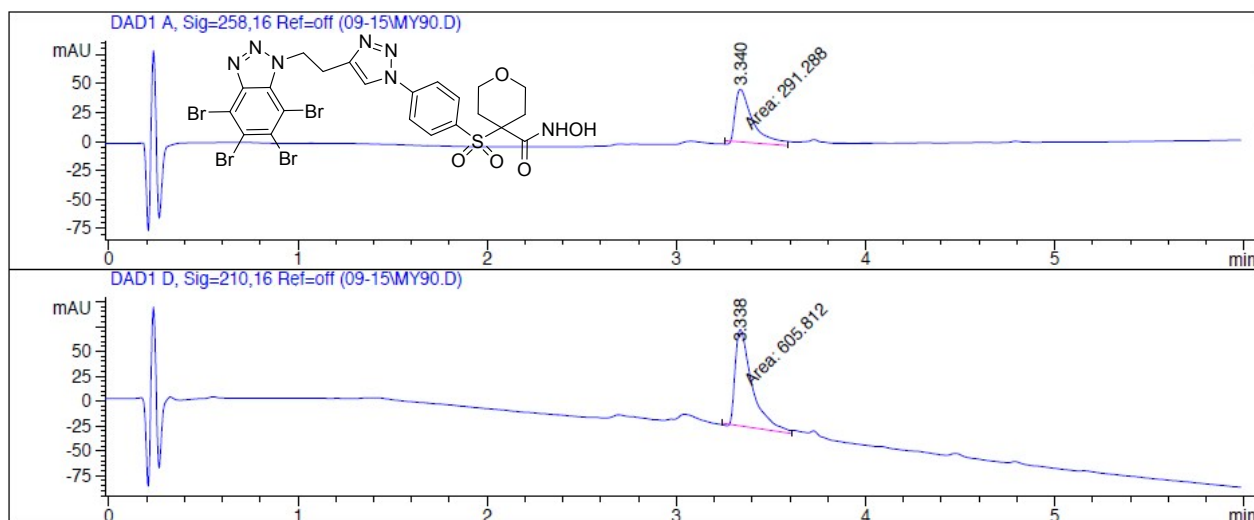

Signal 1: DAD1 A, Sig=258,16 Ref=off

| Peak #   | RetTime [min] | Type | Width [min] | Area [mAU*s] | Height [mAU] | Area %   |
|----------|---------------|------|-------------|--------------|--------------|----------|
| 1        | 3.340         | MM   | 0.1071      | 291.28790    | 45.34159     | 100.0000 |
| Totals : |               |      |             | 291.28790    | 45.34159     |          |

Signal 2: DAD1 D, Sig=210,16 Ref=off

| Peak # | RetTime [min] | Type | Width [min] | Area [mAU*s] | Height [mAU] | Area %   |
|--------|---------------|------|-------------|--------------|--------------|----------|
| 1      | 3.338         | MM   | 0.1043      | 605.81238    | 96.76290     | 100.0000 |

### Compound 14

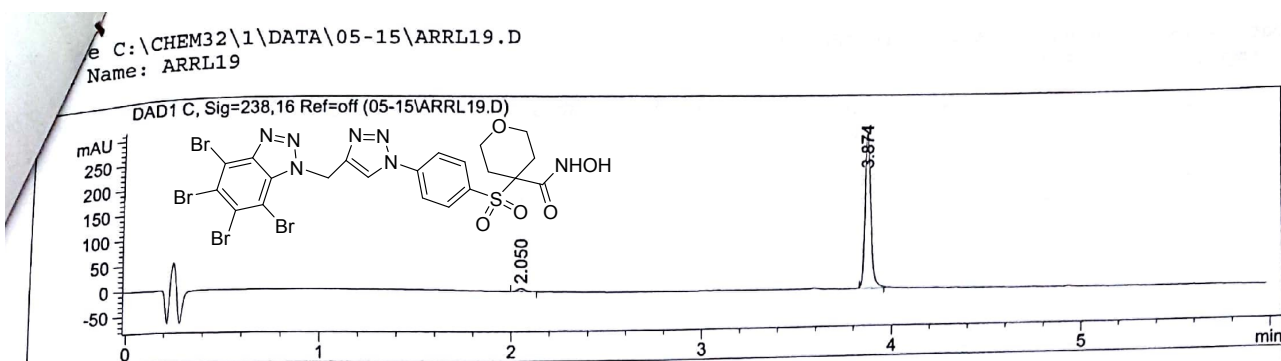

Signal 1: DAD1 C, Sig=238,16 Ref=off

| Peak #   | RetTime [min] | Type | Width [min] | Area [mAU*s] | Height [mAU] | Area %  |
|----------|---------------|------|-------------|--------------|--------------|---------|
| 1        | 2.050         | BB   | 0.0463      | 16.15312     | 5.49427      | 2.4339  |
| 2        | 3.874         | BB   | 0.0324      | 647.52386    | 309.20908    | 97.5661 |
| Totals : |               |      |             | 663.67699    | 314.70334    |         |

# Compound 15

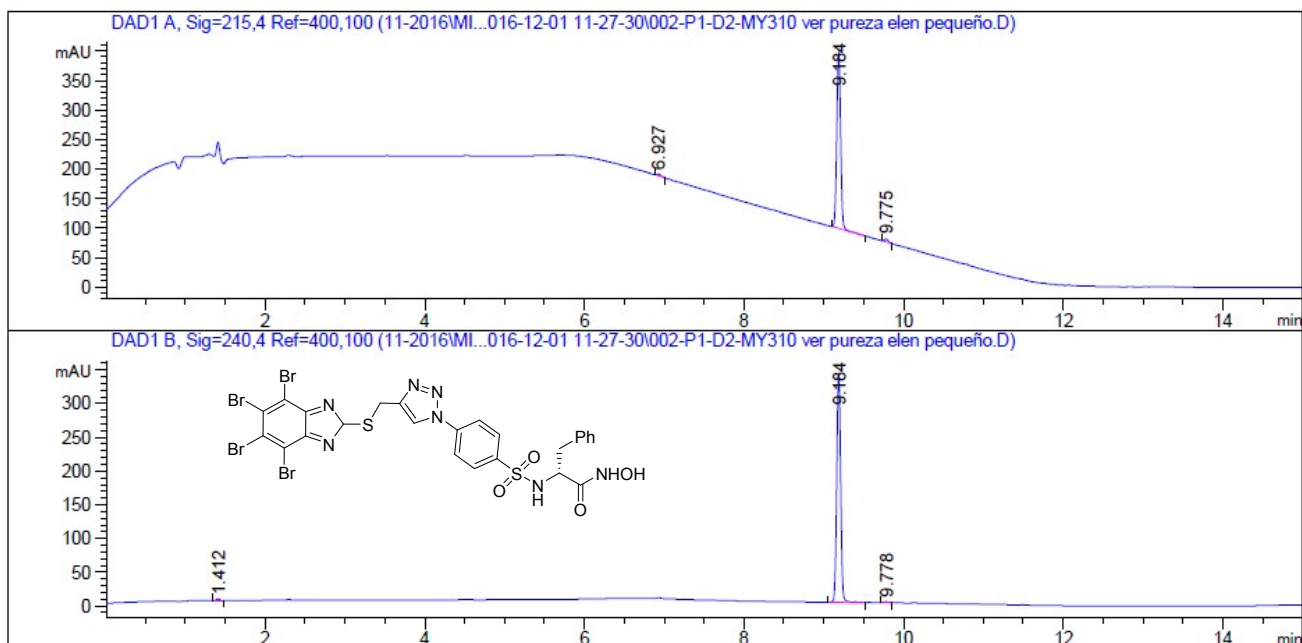

| Peak # | RetTime [min] | Type | Width [min] | Area [mAU*s] | Height [mAU] | Area %  |
|--------|---------------|------|-------------|--------------|--------------|---------|
| 1      | 6.927         | BB   | 0.0592      | 10.32410     | 2.79042      | 1.0288  |
| 2      | 9.184         | BB   | 0.0525      | 979.39569    | 296.72388    | 97.5956 |
| 3      | 9.775         | BB   | 0.0500      | 13.80442     | 4.47530      | 1.3756  |

Totals : 1003.52421 303.98960

Signal 2: DAD1 B, Sig=240,4 Ref=400,100

| Peak # | RetTime [min] | Type | Width [min] | Area [mAU*s] | Height [mAU] | Area %  |
|--------|---------------|------|-------------|--------------|--------------|---------|
| 1      | 1.412         | BB   | 0.0440      | 6.60768      | 2.41005      | 0.5793  |
| 2      | 9.184         | BV R | 0.0526      | 1128.72412   | 341.17834    | 98.9501 |
| 3      | 9.778         | BB   | 0.0508      | 5.36864      | 1.70418      | 0.4706  |

Totals : 1140.70044 345.29257

## Compound 16a

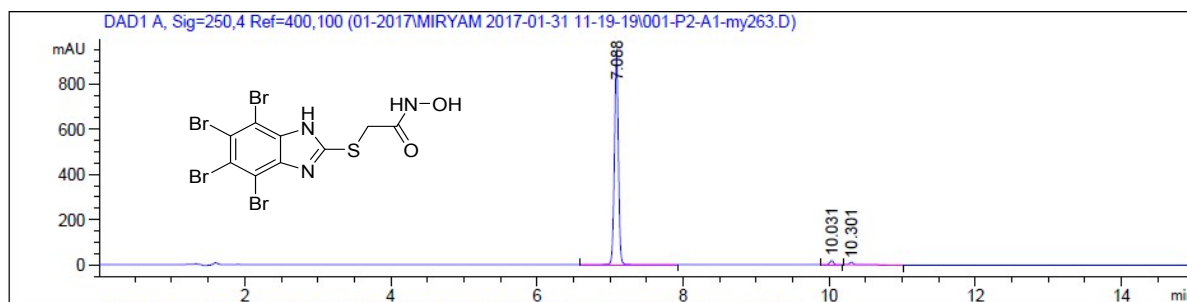

Signal 1: DAD1 A, Sig=250,4 Ref=400,100

| Peak # | RetTime [min] | Type | Width [min] | Area [mAU*s] | Height [mAU] | Area %  |
|--------|---------------|------|-------------|--------------|--------------|---------|
| 1      | 7.088         | BV R | 0.0629      | 3828.67578   | 952.64569    | 97.0944 |
| 2      | 10.031        | BB   | 0.0555      | 67.91229     | 19.07283     | 1.7222  |
| 3      | 10.301        | BB   | 0.0540      | 46.66395     | 12.94800     | 1.1834  |

Totals : 3943.25203 984.66652

## Compound 16b

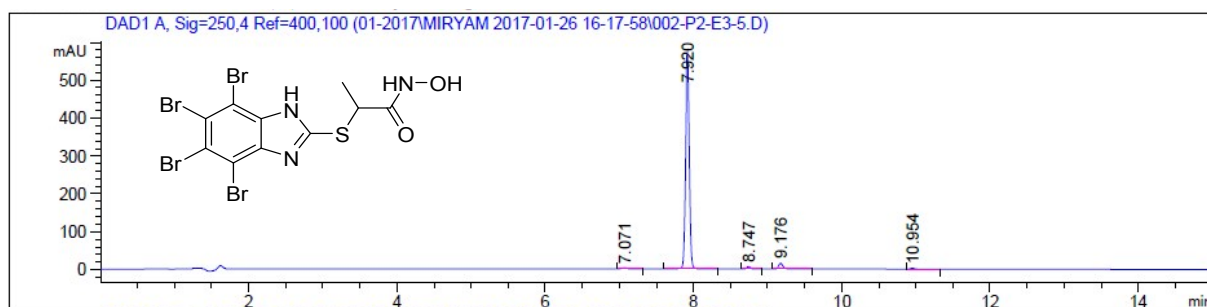

Signal 1: DAD1 A, Sig=250,4 Ref=400,100

| Peak # | RetTime [min] | Type | Width [min] | Area [mAU*s] | Height [mAU] | Area %  |
|--------|---------------|------|-------------|--------------|--------------|---------|
| 1      | 7.071         | BB   | 0.0639      | 9.87806      | 2.40503      | 0.4508  |
| 2      | 7.920         | BB   | 0.0564      | 2084.50806   | 573.21716    | 95.1355 |
| 3      | 8.747         | BB   | 0.0563      | 21.10863     | 5.82742      | 0.9634  |
| 4      | 9.176         | BV R | 0.0646      | 64.24592     | 14.82263     | 2.9321  |
| 5      | 10.954        | BB   | 0.0593      | 11.35330     | 2.92288      | 0.5182  |

Totals : 2191.09397 599.19513

## Compound 16c

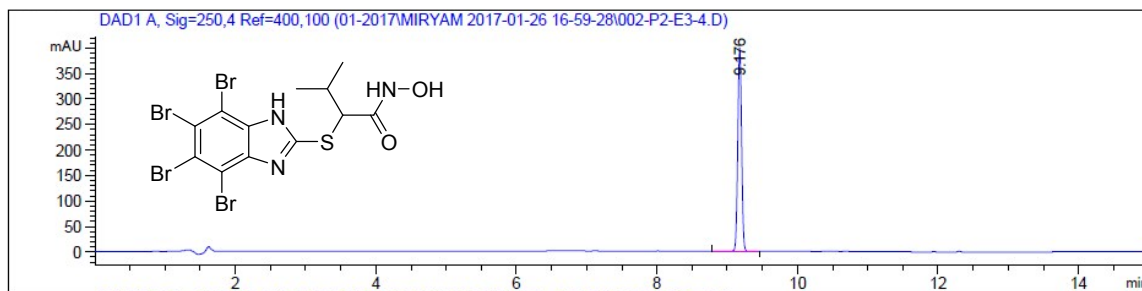

Signal 1: DAD1 A, Sig=250,4 Ref=400,100

| Peak # | RetTime [min] | Type | Width [min] | Area [mAU*s] | Height [mAU] | Area %   |
|--------|---------------|------|-------------|--------------|--------------|----------|
| 1      | 9.176         | BB   | 0.0570      | 1475.62732   | 400.65625    | 100.0000 |

Totals : 1475.62732 400.65625

## Compound 19

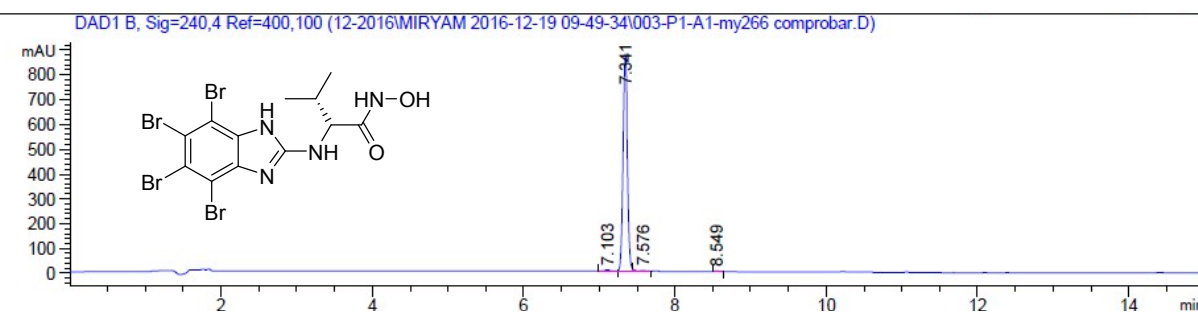

Signal 2: DAD1 B, Sig=240,4 Ref=400,100

| Peak # | RetTime [min] | Type | Width [min] | Area [mAU*s] | Height [mAU] | Area %  |
|--------|---------------|------|-------------|--------------|--------------|---------|
| 1      | 7.103         | BV E | 0.0730      | 26.08159     | 5.33831      | 0.7006  |
| 2      | 7.341         | VV R | 0.0667      | 3666.46558   | 877.79877    | 98.4926 |
| 3      | 7.576         | VB E | 0.0808      | 19.16255     | 3.45139      | 0.5148  |
| 4      | 8.549         | VB   | 0.0537      | 10.86884     | 3.19425      | 0.2920  |

Totals : 3722.57856 889.78270

## Compound 22a

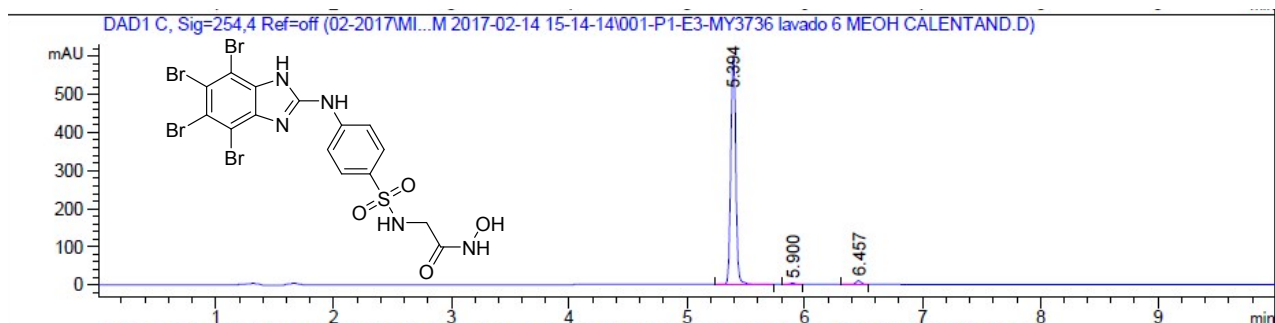

Signal 3: DAD1 C, Sig=254,4 Ref=off

| Peak # | RetTime [min] | Type | Width [min] | Area [mAU*s] | Height [mAU] | Area %  |
|--------|---------------|------|-------------|--------------|--------------|---------|
| 1      | 5.394         | BB   | 0.0465      | 1776.49707   | 600.34253    | 97.9191 |
| 2      | 5.900         | BB   | 0.0557      | 9.94196      | 2.77997      | 0.5480  |
| 3      | 6.457         | VB R | 0.0467      | 27.81124     | 9.33900      | 1.5329  |

Totals : 1814.25027 612.46150

## Compound 22b

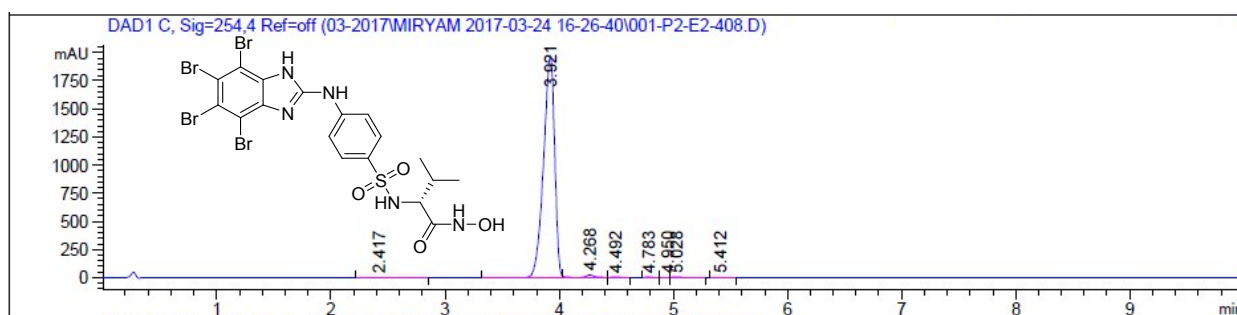

Signal 3: DAD1 C, Sig=254,4 Ref=off

| Peak # | RetTime [min] | Type | Width [min] | Area [mAU*s] | Height [mAU] | Area %  |
|--------|---------------|------|-------------|--------------|--------------|---------|
| 1      | 2.417         | BB   | 0.1622      | 20.04967     | 1.85299      | 0.1480  |
| 2      | 3.921         | BV R | 0.1026      | 1.32805e4    | 1971.12146   | 98.0400 |
| 3      | 4.268         | VV E | 0.0903      | 146.82066    | 23.68395     | 1.0839  |
| 4      | 4.492         | VB E | 0.0698      | 29.71102     | 6.43984      | 0.2193  |
| 5      | 4.783         | VB   | 0.0657      | 19.51625     | 4.58278      | 0.1441  |
| 6      | 4.950         | BV   | 0.0485      | 7.19500      | 2.30171      | 0.0531  |
| 7      | 5.028         | VB   | 0.0707      | 33.33864     | 7.10505      | 0.2461  |
| 8      | 5.412         | BB   | 0.0646      | 8.86507      | 2.12915      | 0.0654  |

Totals : 1.35460e4 2019.21694

# Compound 26

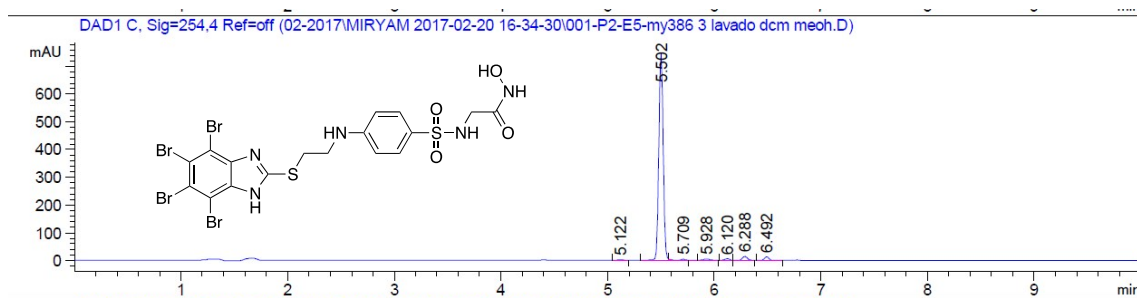

Signal 3: DAD1 C, Sig=254,4 Ref=off

| Peak # | RetTime [min] | Type | Width [min] | Area [mAU*s] | Height [mAU] | Area %  |
|--------|---------------|------|-------------|--------------|--------------|---------|
| 1      | 5.122         | BB   | 0.0464      | 7.05643      | 2.39108      | 0.3065  |
| 2      | 5.502         | BV R | 0.0460      | 2176.44702   | 747.49591    | 94.5280 |
| 3      | 5.709         | VV E | 0.0600      | 10.99228     | 2.78540      | 0.4774  |
| 4      | 5.928         | VB E | 0.0687      | 15.79074     | 3.24691      | 0.6858  |
| 5      | 6.120         | BB   | 0.0451      | 13.48071     | 4.75369      | 0.5855  |
| 6      | 6.288         | VB R | 0.0499      | 42.77067     | 13.17952     | 1.8576  |
| 7      | 6.492         | BV R | 0.0463      | 35.89937     | 12.21584     | 1.5592  |

Totals : 2302.43722 786.06835



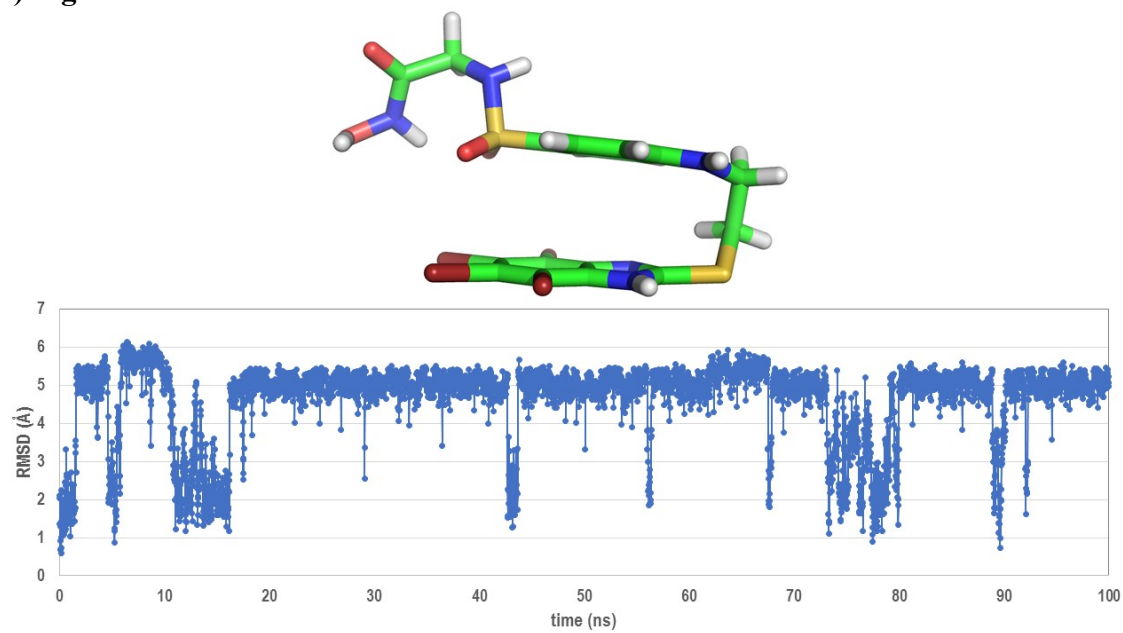

**Figure 2:** Top. PyMOL stick representation of the most populated conformer of **26** in water. Bottom. Graphical representation of the Root Mean Square Deviation (RMSD) of compound **26** in water.

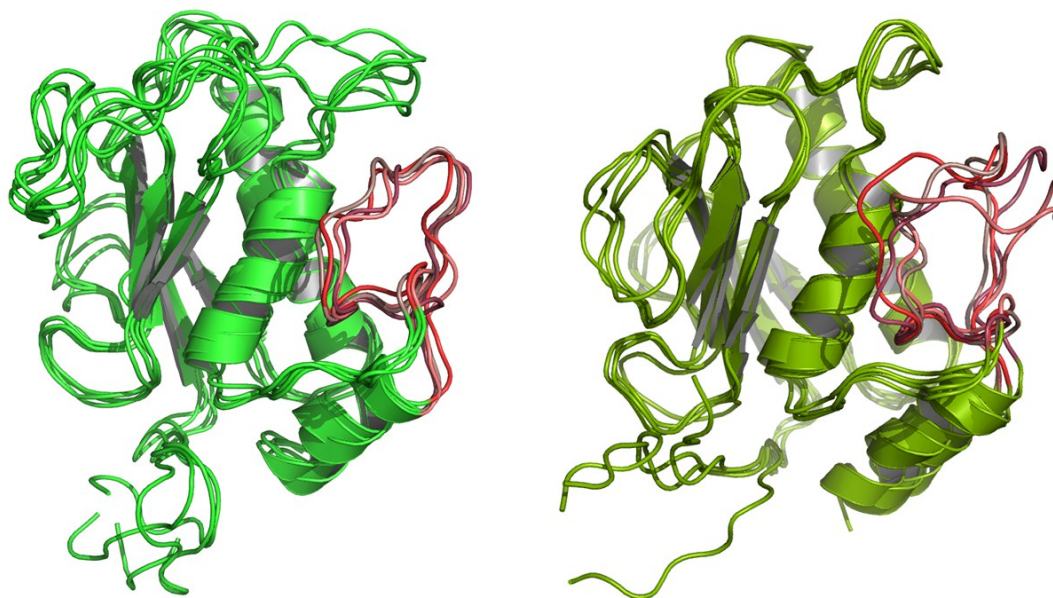

**Figure 3:** PyMOL stick and cartoon representation of the 4  $\Omega$ -loop conformers (represented in different shades of red) extracted from the 20ns MD simulations of MMP2 (left) and MMP13 (right). For the sake of clarity, the  $\text{Ca}^{2+}$  and  $\text{Zn}^{2+}$  ions are not represented.
